# Supplementary material
Source: Springer Nature journal article supplement (https://www.springermedizin.de/resource/supplementary/12939_2006_84_MOESM15_ESM.pdf/9551502)

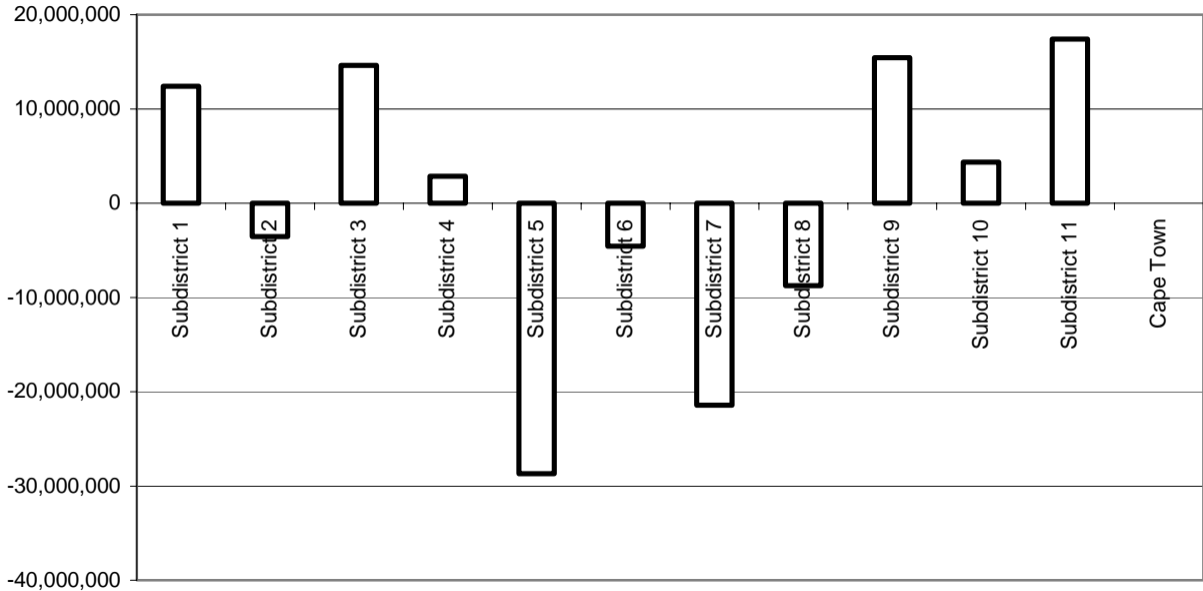

Supplement: MOESM15 [file 9551502]
